# Supplementary material for: Interfacial processes studied by coupling electrochemistry at the polarised liquid–liquid interface with in situ confocal Raman spectroscopy
Source: Royal Society of Chemistry journal article supplement (doi:10.1039/c4cp03254c), 2014-10-28
Supplement: c4cp03254c1.pdf [file c4cp03254c1.pdf]

## Supplementary information

### Interfacial processes studied by the coupling of electrochemistry at the polarised liquid-liquid interface with *in-situ* confocal Raman spectroscopy

Lukasz Poltorak, Manuel Dossot, Grégoire Herzog,\* Alain Walcarius

Laboratoire de Chimie Physique et Microbiologie pour l'Environnement (LCPME), UMR 7564, CNRS –  
Université de Lorraine, 405 rue de Vandœuvre, 54600 Villers-lès-Nancy, France.

\*Corresponding author: [gregoire.herzog@univ-lorraine.fr](mailto:gregoire.herzog@univ-lorraine.fr)

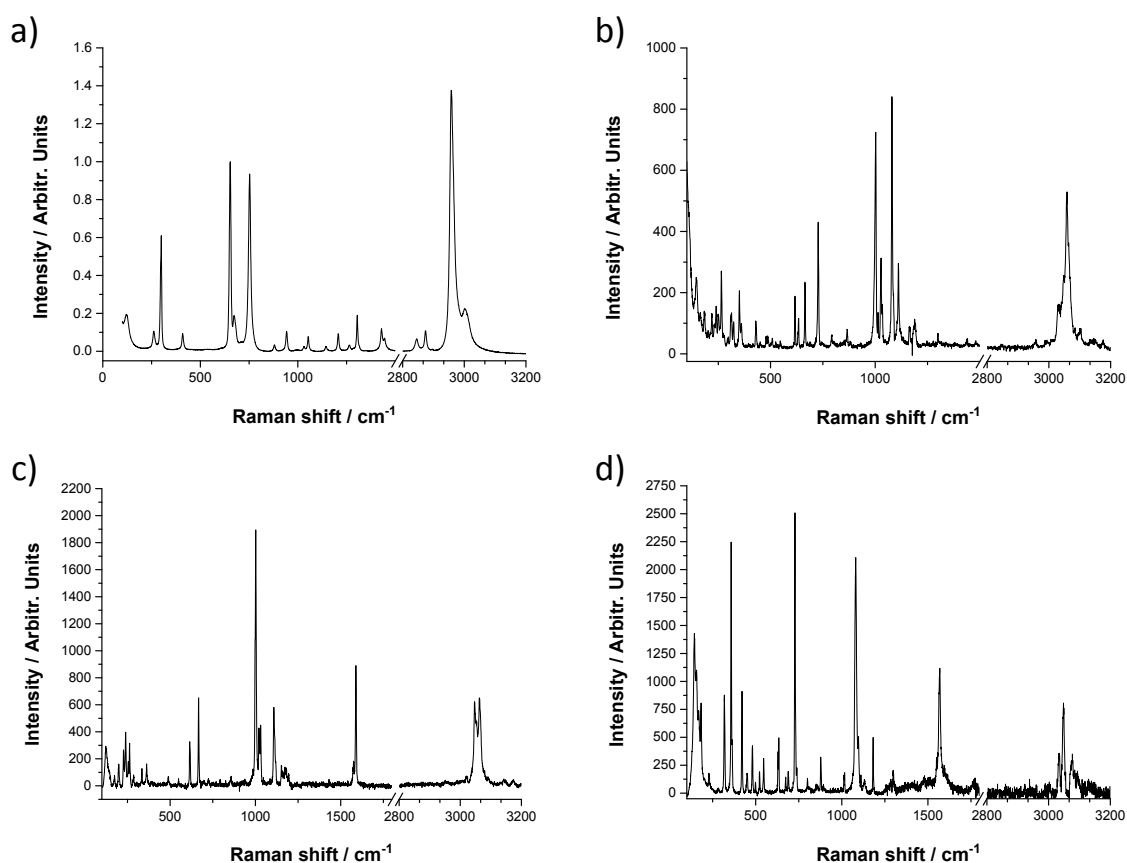

**Figure S11.** Raman spectra recorded for a) DCE, b) BTPPA<sup>+</sup>TPBCl<sup>-</sup>, c) BTPPA<sup>+</sup>Cl<sup>-</sup> and d) K<sup>+</sup>TPBCl<sup>-</sup>.

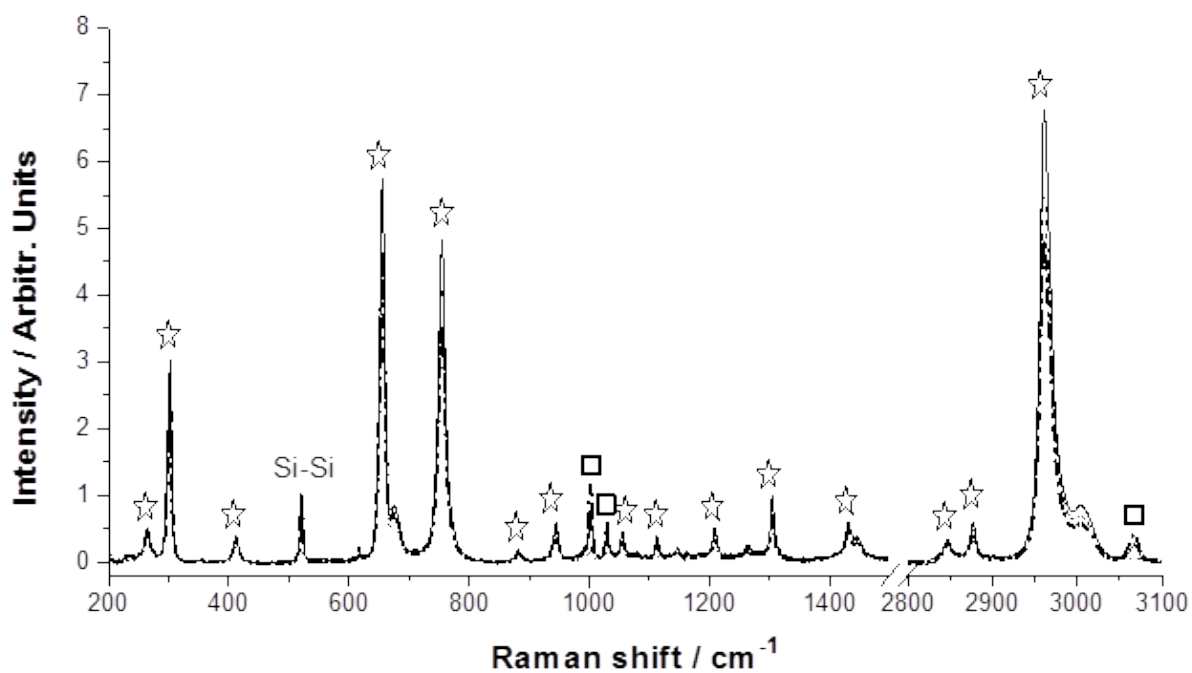

**Figure SI2.** Full Raman spectra recorded at the  $\mu$ ITIES (5 mM NaCl aqueous phase and 10 mM BTPPA<sup>+</sup>TPBCl<sup>-</sup> in organic phase) at open circuit potential (dashed line), under negative polarization potential -300 mV (solid line) and -800 mV (dotted line). Raman bands marked with (□) were assigned to BTPPA<sup>+</sup> and with (★) to DCE.

**Table S11.** Summary of the bands observed in the different Raman spectra

| Molecule of interest     | Raman shift frequency <sup>1</sup> cm <sup>-1</sup> | Peak assignment <sup>1</sup>                              | Description <sup>1</sup>                                                                                                             |
|--------------------------|-----------------------------------------------------|-----------------------------------------------------------|--------------------------------------------------------------------------------------------------------------------------------------|
| <b>CTA<sup>+</sup></b>   | 3000 – 2840                                         | -CH <sub>2</sub> - and -CH <sub>3</sub> stretching        | Strong and characteristic bands                                                                                                      |
|                          | 2962 ± 10                                           | -CH <sub>3</sub> Antisymmetric stretching                 | Strong intensity and characteristic frequencies                                                                                      |
|                          | 2926                                                | -CH <sub>2</sub> - Antisymmetric stretching               | Strong in Raman                                                                                                                      |
|                          | 2872 ± 10                                           | -CH <sub>3</sub> symmetric stretching                     | Strong intensity and characteristic frequencies                                                                                      |
|                          | 2853                                                | -CH <sub>2</sub> - Symmetric stretching                   | Often overlapped with CH <sub>3</sub> in anti-symmetrical region                                                                     |
|                          | 1470 – 1440                                         | -CH <sub>3</sub> Antisymmetric bending                    | Medium intensity                                                                                                                     |
|                          | 1470 – 1340                                         | CH <sub>2</sub> and CH <sub>3</sub> bending               | Not necessarily visible in Raman spectra                                                                                             |
|                          | 1465                                                | Scissoring (bending) mode                                 |                                                                                                                                      |
|                          | 1305 – 1295                                         | -(CH <sub>2</sub> ) <sub>n</sub> - in phase twisting mode | Medium – strong intensity in Raman                                                                                                   |
| <b>BTPPA<sup>+</sup></b> | 3100 – 3000                                         | Aromatic ring in C-H stretching region                    |                                                                                                                                      |
|                          | 1600 – 1000                                         | Five aryl C-H bonds (in aromatic)                         |                                                                                                                                      |
|                          | 1500 – 1141                                         | P=N                                                       |                                                                                                                                      |
|                          | 1130 – 1090                                         | P-(Ph) <sub>3</sub>                                       | Weak in Raman                                                                                                                        |
|                          | 1010 – 990                                          | Aromatic rings                                            | Very strong in Raman                                                                                                                 |
|                          | 1000 – 700                                          | C – H bending                                             |                                                                                                                                      |
| <b>TPBCl<sup>-</sup></b> | 3070 – 3030                                         | C-H of substituted benzenes                               | One strong band                                                                                                                      |
|                          | 1620 – 1585                                         | Mono- and disubstitued benzene                            | The two quadrant stretch components give rise to two bands. When benzene is substituent with Cl the bands will occur at lower limit. |
|                          | 1590 – 1565                                         |                                                           |                                                                                                                                      |
|                          | 1083                                                | Aryl-Cl in chlorobenzene                                  | For phenyl group on para this                                                                                                        |

|            |                        |                                                                               |                                                                             |
|------------|------------------------|-------------------------------------------------------------------------------|-----------------------------------------------------------------------------|
|            |                        |                                                                               | band is seen in the 1130–1190 cm <sup>-1</sup> region. From m to s in Raman |
|            | 420 – 390              | Mono and parasubstitued benzenes                                              | Very weak Raman band                                                        |
| <b>DCE</b> | 3030 <sup>2</sup>      | -CH <sub>2</sub> antisymmetric stretching                                     |                                                                             |
|            | 2987 <sup>2</sup>      | -CH <sub>3</sub> symmetric stretching                                         |                                                                             |
|            | 730 – 710 <sup>2</sup> | Cl-(CH <sub>2</sub> ) <sub>n</sub> -Cl stretching mode of the trans conformer |                                                                             |
|            | 657 <sup>2</sup>       | CH <sub>3</sub> -CH <sub>2</sub> -Cl stretching mode of the gauche conformer  |                                                                             |

1. D. Lin-Vien, N. B. Colthup, W. G. Fateley, and J. G. Grasselli, *The Handbook of Infrared and Raman Characteristic Frequencies of Organic Molecules*, Academic Press, London, 1991.
2. M. D. Young, N. C. Borjemscaia, and B. D. Wladkowski, *J. Chem. Educ.*, 2005, **82**, 912.
